# Supplementary material
Source: publisher figshare collection journal article supplement (https://acs.figshare.com/ndownloader/files/12853874)
Supplement: Supplementary file 1 [file 12853874]

## Supporting Information

### **One-Step in Situ Ball Milling Synthesis of Polymer-Functionalized Few-Layered Boron Nitride and Its Application in High Thermally Conductive Cellulose Composites**

Cuiping Yu<sup>†‡§</sup>, Qichong Zhang<sup>†</sup>, Jun Zhang<sup>†</sup>, Renjie Geng<sup>†</sup>, Wei Tian<sup>†</sup>, Xiaodong Fan<sup>†</sup>,  
Yagang Yao<sup>\*†§</sup>

<sup>†</sup> Division of Advanced Nanomaterials, Key Laboratory of Nanodevices and Applications, Joint Key Laboratory of Functional Nanomaterials and Devices, CAS Center for Excellence in Nanoscience, Suzhou Institute of Nano-tech and Nano-bionics, Chinese Academy of Sciences, Suzhou 215123, China

<sup>‡</sup> The Key Laboratory of Space Applied Physics and Chemistry, Ministry of Education and Shaanxi Key Laboratory of Macromolecular Science and Technology, School of Science, Northwestern Polytechnical University, Xi'an 710072, China

<sup>§</sup> Division of Nanomaterials, Suzhou Institute of Nano-Tech and Nano-Bionics, Nanchang, Chinese Academy of Sciences, Nanchang 330200, China

\* Corresponding author.

Email: ygyao2013@sinano.ac.cn (Y. G. Yao)

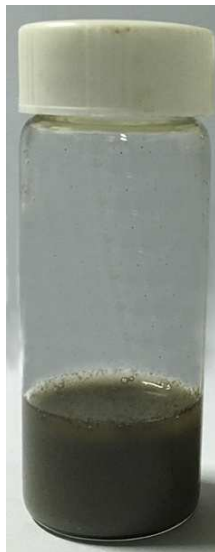

**Figure S-1.** The photograph of exfoliated h-BN@PDA dispersion prepared via ball milling in water.

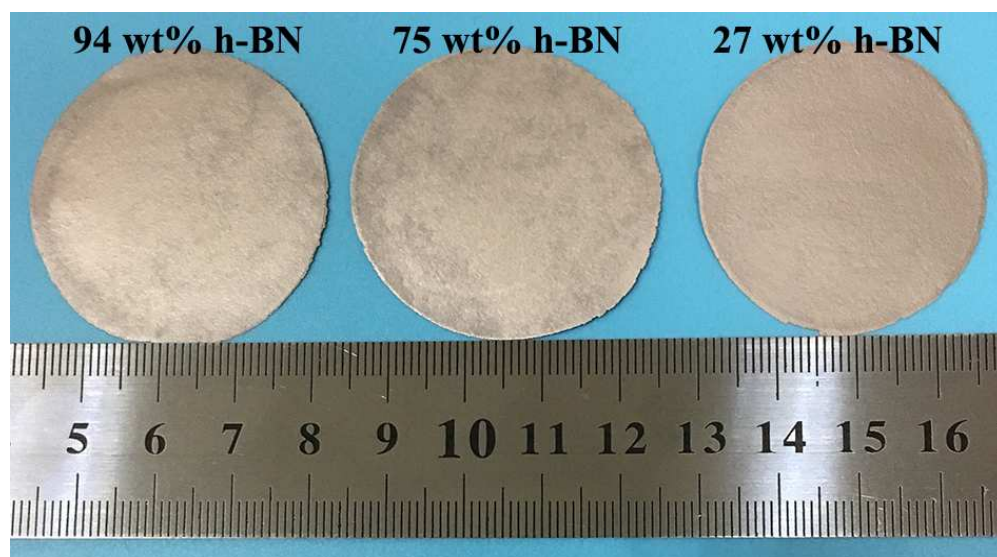

**Figure S-2.** The photographs of exfoliated h-BN@PDA/CNC composites with h-BN contents of 94 wt%, 75 wt%, 27 wt%, respectively.

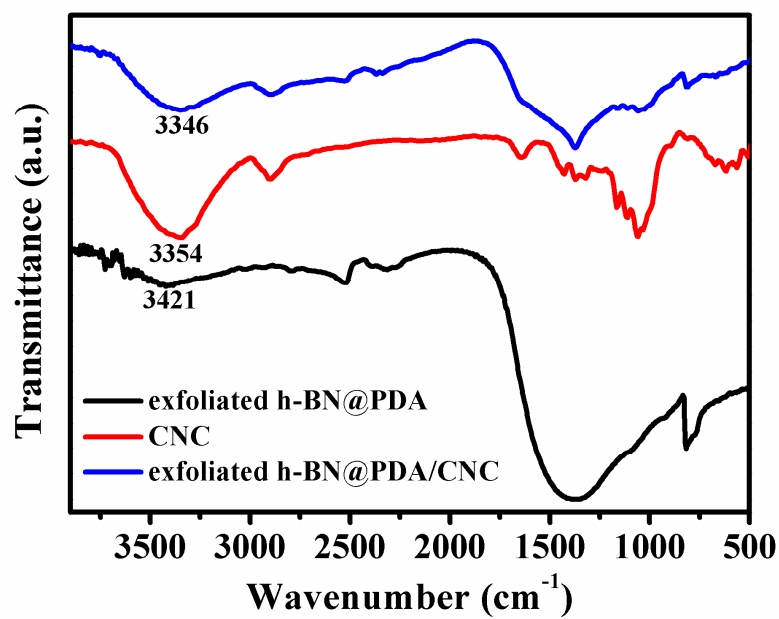

**Figure S-3.** FTIR spectrums of CNC, exfoliated h-BN@PDA powder and exfoliated h-BN@PDA/CNC composite.

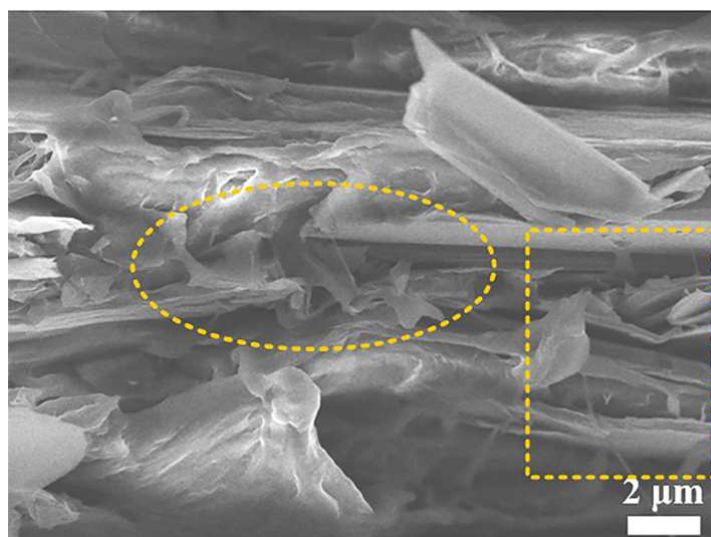

**Figure S-4.** SEM image of h-BN@PDA/CNC composite.

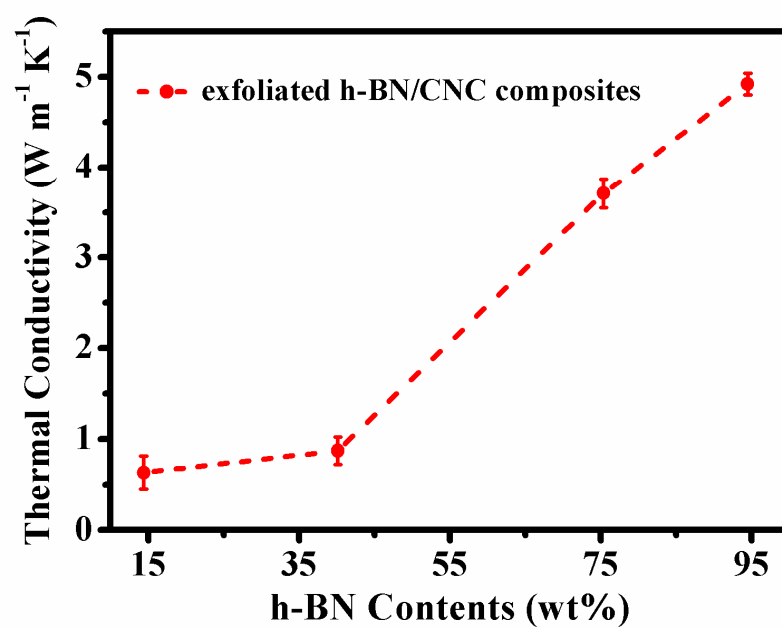

**Figure S-5.** The out-of-plane thermal conductivity of exfoliated h-BN@PDA/CNC composites.

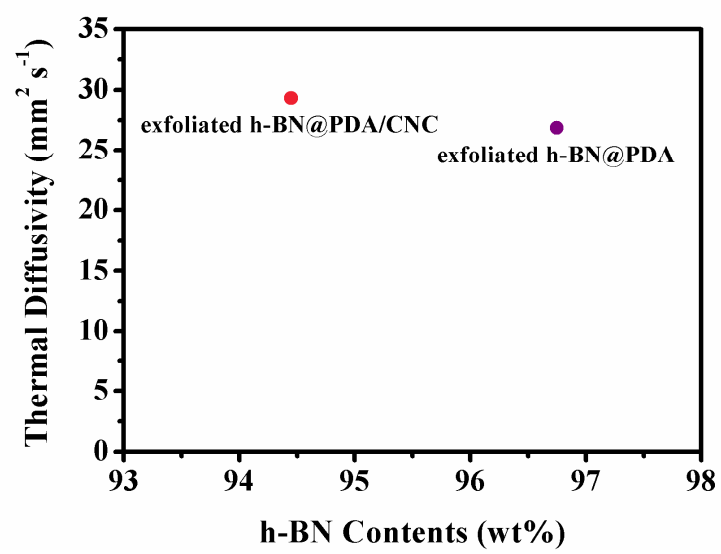

**Figure S-6.** The thermal diffusivity of exfoliated h-BN@PDA/CNC composites and exfoliated h-BN@PDA.

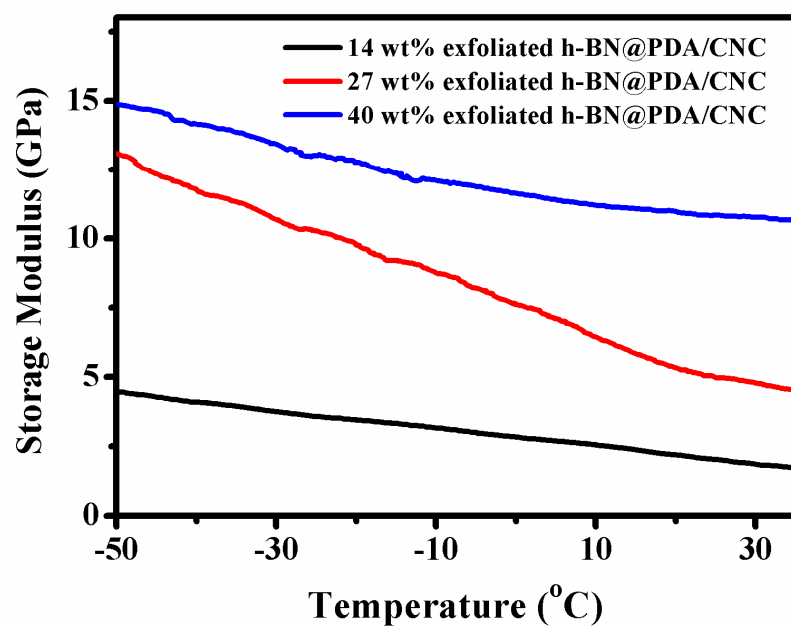

**Figure S-7.** Storage modulus of exfoliated h-BN@PDA/CNC composites with various h-BN contents.



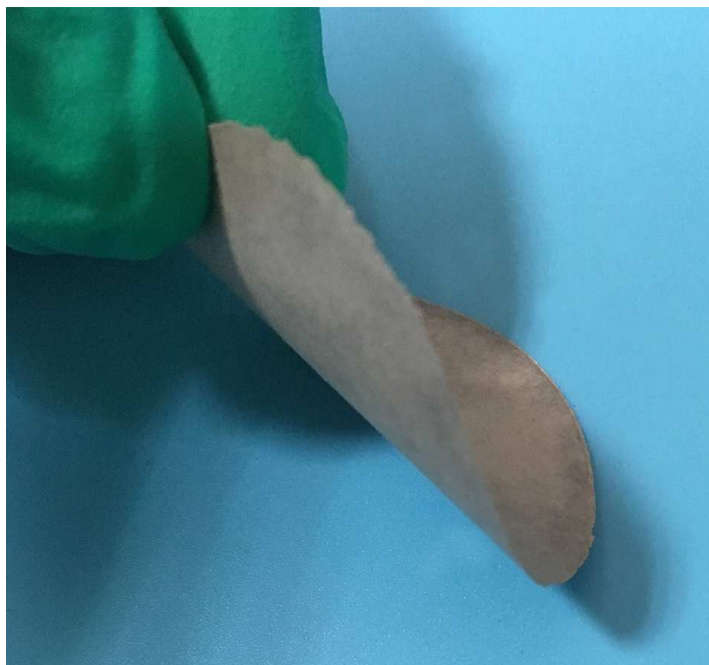

**Figure S-8.** The photograph of exfoliated h-BN@PDA/CNC composite when folded.
